# Supplementary material for: Mediation of the Same Epigenetic and Transcriptional Effect by Independent Osteoarthritis Risk–Conferring Alleles on a Shared Target Gene, COLGALT2
Source: PubMed Central journal article supplement (PMC10952352; doi:10.1002/art.42427), 2023-04-11
Supplement: ART-75-910-s002.pdf [file ART-75-910-s002.pdf]

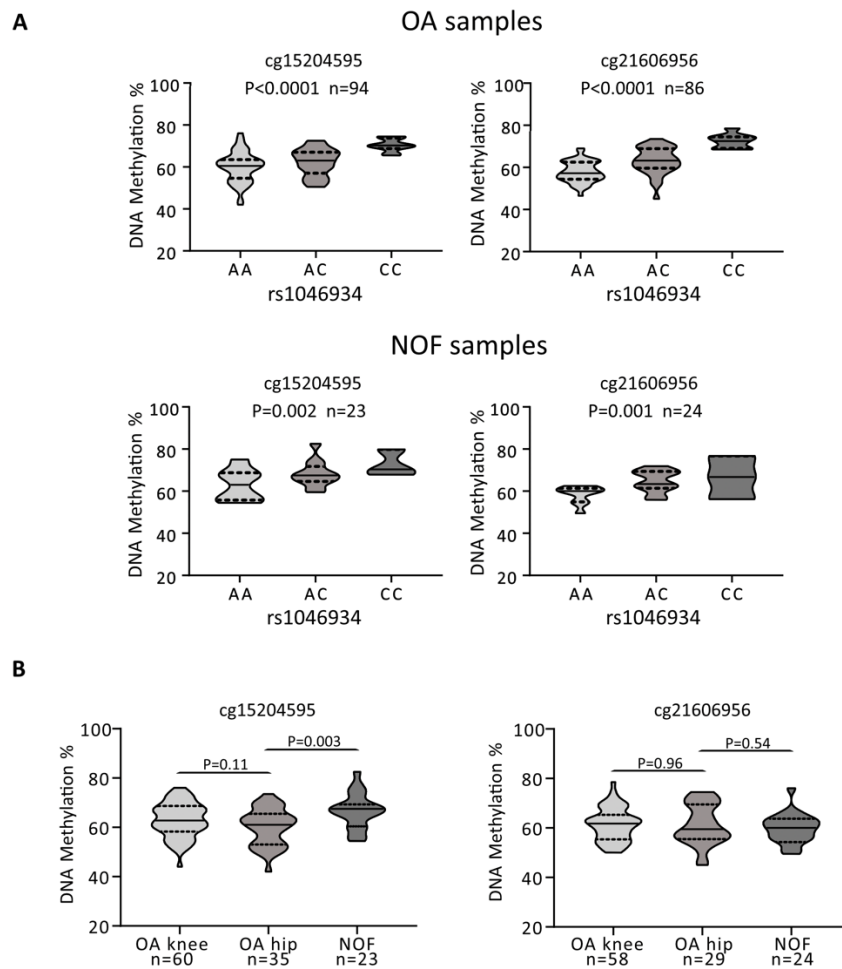

**Supplementary Figure 1.** Stratification of the arthroplasty methylation data. **A.** mQTL analysis with the replication data stratified into OA and femoral neck fracture (NOF).  $P$  values calculated by linear regression. **B.** Stratification of the methylation data by OA knee, OA hip and NOF irrespective of rs1046934 genotype.  $P$  values calculated by a Mann-Whitney U test. For A and B, the solid and dashed horizontal lines of the violin plots represent the median and interquartile range.

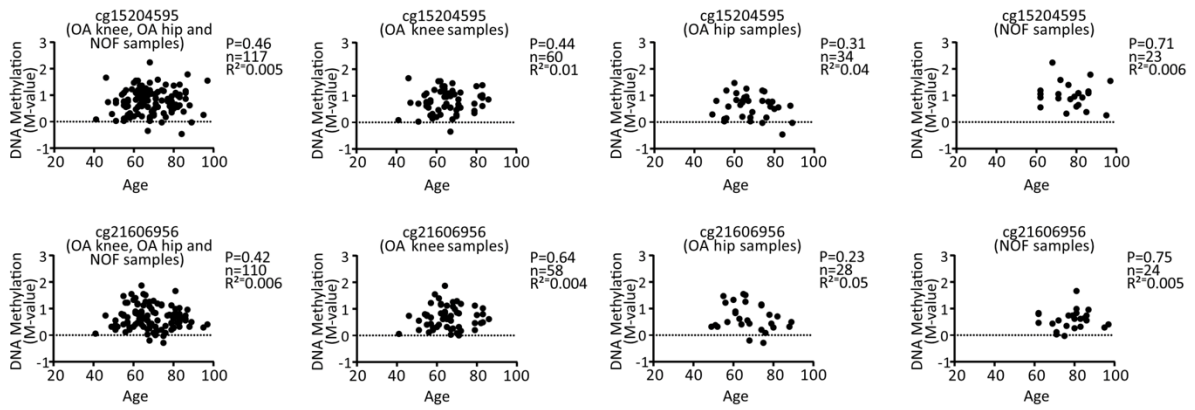

**Supplementary Figure 2.** Age versus methylation. Linear regression was used to test for association between age at surgery in years and DNAm levels at cg15204595 (top) and cg21606956 (bottom). Patients were studied combined (OA knee, OA hip and femoral neck fracture [NOF]) and following stratification. Each dot is data from one individual.

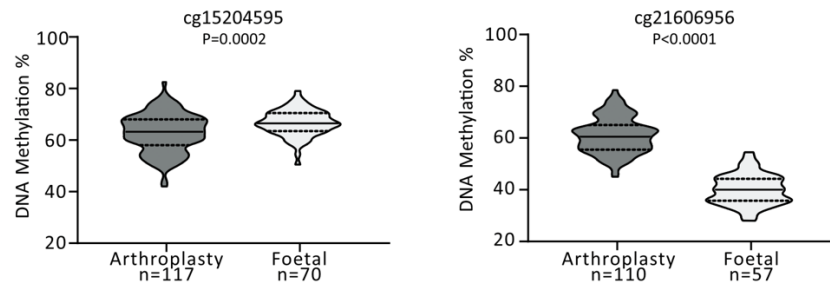

**Supplementary Figure 3.** CpG methylation levels in arthroplasty and fetal samples. Stratification of the arthroplasty and fetal methylation data irrespective of rs1046934 genotype. P values calculated by a Mann-Whitney U test. Solid and dashed horizontal lines of the violin plots represent the median and interquartile range.

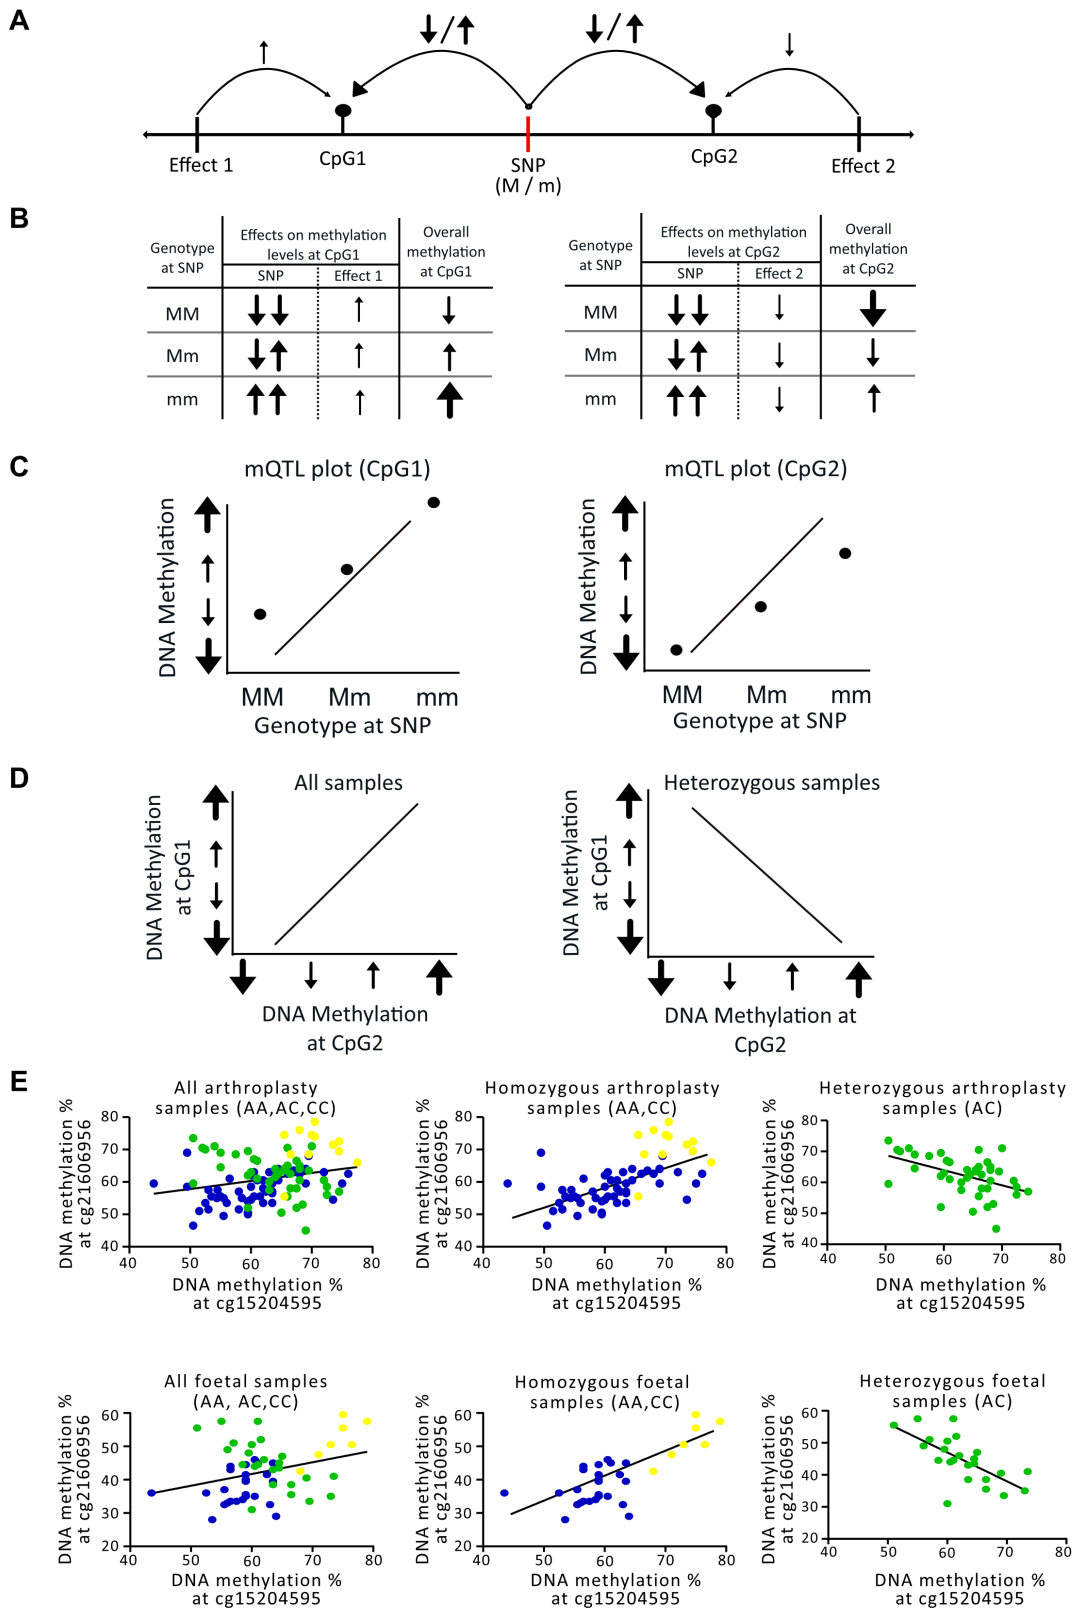

**Supplementary Figure 4.** Theoretical model to account for the opposing slopes of the *COLGALT2* meQTLs at cg15204595 and cg21606956. To be read in conjunction with Supplementary Text. **A.** Schematic diagram showing the factors affecting the methylation levels at CpG1 and CpG2 (marked by black circles). The SNP (M, major allele; m, minor allele)

is marked by a red line and Effect 1 and Effect 2 are marked with black lines. Arrows indicate the effect the different factors have on the methylation levels at the two CpG sites with the direction of the arrowhead indicating the direction of the effect (up = increased methylation; down = decreased methylation) and the thickness of the arrow corresponding to the strength of the effect (thin = weaker effect; thick = stronger effect). **B.** Table summarising the cumulative effect of the SNP and Effect 1 and Effect 2 on the methylation levels at CpG1 (left) and CpG2 (right) for individuals homozygous (MM or mm) and heterozygous (Mm) for the SNP. The effects are represented by arrows with the direction of the arrowhead indicating the direction of the effect (up = increased methylation; down = decreased methylation) and the thickness of the arrow corresponding to the strength of the effect (thin = weaker effect; thick = stronger effect). **C.** Predicted mQTL plots at CpG1 (left) and CpG2 (right) using the expected overall methylation levels presented in B. Methylation levels are represented on the y-axis by arrows with the direction of the arrowhead indicating the direction of the effect (up = increased methylation; down = decreased methylation) and the thickness of the arrow corresponding to the levels of methylation (thin = medium high/low levels; thick = very high/low levels). Genotype at the SNP is on the x-axis (MM, Mm or mm). The overall methylation levels expected for each genotype are represented by a dot and the mQTL direction is indicated by a line. **D.** Plots showing the expected overall methylation levels at CpG1 plotted against the expected overall methylation levels at CpG2 in all individuals (left) and in heterozygous individuals (right). Methylation levels are represented by arrows with the direction of the arrowhead indicating the direction of the effect (up = increased methylation; down = decreased methylation) and the thickness of the arrow corresponding to the levels of methylation (thin = medium high/low levels; thick = very high/low levels). The lines show the direction of the predicted associations. **E.** Plots showing the measured methylation levels at cg15204595 plotted against the measured methylation levels at cg21606956 in all arthroplasty (top left) and all fetal (bottom left) samples, in arthroplasty (top middle) and fetal (bottom middle) samples homozygous (AA and CC) for rs1046934, and in arthroplasty (top right) and fetal (bottom right) samples heterozygous (AC) for rs1046934. Each sample is represented by a dot with the colour of the dot corresponding to rs1046934 genotype (blue = AA, green = AC, yellow = CC). The trend lines show the direction of the associations.

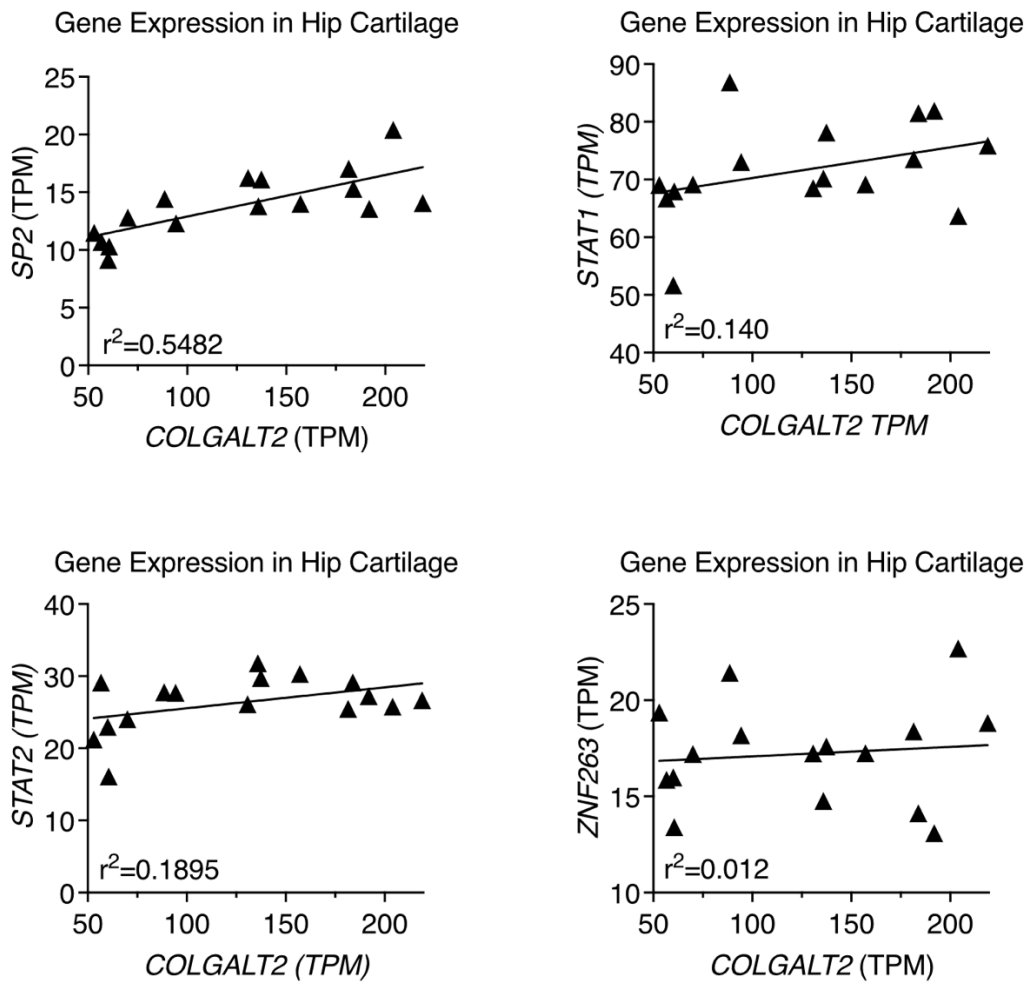

**Supplementary Figure 5.** Relationship between expression of *COLGALT2* and predicted functional transcription factors (TFs). Hip cartilage RNA-sequencing data from 16 arthroplasty patients (10 OA and 6 femoral neck fracture [NOF]).  $r^2$  values calculated by linear regression. TPM, transcripts per million.



TFs are marked by grey bars with the direction of the arrows within the boxes indicating the DNA strand the TF is predicted to bind to: arrows pointing to the left = antisense strand; arrows pointing to the right = sense strand. **C.** Expression levels (TPM, transcripts per million) of those TFs predicted to bind within 30bp of cg15204595 and cg21606956 in hip cartilage RNA-sequencing data from OA (n = 10, dark grey) and femoral neck fracture (NOF) (n = 6, light grey) patients. Bars show the mean  $\pm$ SEM. Y-axis is a linear segmented scale with three segments.

| <b>Database</b>               | <b>Data type</b>                                             | <b>URL</b>                                                                                                |
|-------------------------------|--------------------------------------------------------------|-----------------------------------------------------------------------------------------------------------|
| Protein Data Bank             | Macromolecular structures                                    | <a href="https://www.rcsb.org">https://www.rcsb.org</a>                                                   |
| gnomAD                        | Impact on protein function of missense DNA variants          | <a href="https://gnomad.broadinstitute.org">https://gnomad.broadinstitute.org</a>                         |
| PolyPhen                      | Impact on protein function of missense DNA variants          | <a href="http://genetics.bwh.harvard.edu/pph2/">http://genetics.bwh.harvard.edu/pph2/</a>                 |
| Mutation Taster               | Impact on protein function of missense DNA variants          | <a href="https://www.mutationtaster.org/">https://www.mutationtaster.org/</a>                             |
| ROADMAP                       | Chromatin state data                                         | <a href="http://www.roadmapepigenomics.org">http://www.roadmapepigenomics.org</a>                         |
| 3D Genome Browser             | Chromatin capture Hi-C                                       | <a href="http://3dgenome.fsm.northwestern.edu/chic.php">http://3dgenome.fsm.northwestern.edu/chic.php</a> |
| UCSC Genome Browser           | Integrated genomic datasets                                  | <a href="https://genome.ucsc.edu">https://genome.ucsc.edu</a>                                             |
| LDlink                        | SNP linkage disequilibrium measures                          | <a href="https://ldlink.nci.nih.gov/?tab=home">https://ldlink.nci.nih.gov/?tab=home</a>                   |
| JASPAR                        | Transcription factor binding profiles                        | <a href="https://jaspar.genereg.net">https://jaspar.genereg.net</a>                                       |
| SNP2TFBS                      | Effect of DNA variants on transcription factor binding sites | <a href="https://ccg.epfl.ch/snp2tfbs/">https://ccg.epfl.ch/snp2tfbs/</a>                                 |
| Gene Expression Omnibus (GEO) | Genomics data repository                                     | <a href="https://www.ncbi.nlm.nih.gov/geo/">https://www.ncbi.nlm.nih.gov/geo/</a>                         |

**Supplementary Table 1.** The public databases used in this study.



| Sample ID | Sex    | Joint | Age at surgery (years) | Disease |
|-----------|--------|-------|------------------------|---------|
| 4809      | Male   | Knee  | 79                     | OA      |
| 4883      | Female | Knee  | 68                     | OA      |
| 4971      | Male   | Knee  | 64                     | OA      |
| 5099      | Female | Knee  | 57                     | OA      |
| 5103      | Female | Knee  | 58                     | OA      |
| 5104      | Female | Knee  | 67                     | OA      |
| 5137      | Female | Hip   | 52                     | OA      |
| 5163      | Male   | Knee  | 55                     | OA      |
| 5164      | Male   | Knee  | 55                     | OA      |
| 5178      | Female | Knee  | 83                     | OA      |
| 5188      | Female | Knee  | 64                     | OA      |
| 5214      | Male   | Knee  | 57                     | OA      |
| 5764      | Male   | Hip   | 64                     | OA      |
| 5999      | Female | Knee  | 79                     | OA      |
| 6135      | Male   | Knee  | 71                     | OA      |
| 6156      | Female | Hip   | 67                     | OA      |
| 6184      | Female | Knee  | 55                     | OA      |
| 6218      | Female | Hip   | 79                     | OA      |
| 6224      | Female | Knee  | 62                     | OA      |
| 6342      | Female | Knee  | 62                     | OA      |
| 6359      | Female | Knee  | 70                     | OA      |
| 6363      | Female | Knee  | 68                     | OA      |
| 6378      | Male   | Knee  | 54                     | OA      |
| 6506      | Female | Knee  | 59                     | OA      |
| 6770      | Female | Knee  | 80                     | OA      |
| 6772      | Male   | Knee  | 71                     | OA      |
| 6778      | Male   | Knee  | 63                     | OA      |
| 6783      | Female | Knee  | 55                     | OA      |
| 6784      | Female | Knee  | 46                     | OA      |
| 6786      | Male   | Knee  | 82                     | OA      |
| 6787      | Male   | Knee  | 64                     | OA      |
| 6788      | Male   | Knee  | 66                     | OA      |
| 6803      | Female | Knee  | 65                     | OA      |
| 6818      | Female | Knee  | 62                     | OA      |
| 6852      | Female | Knee  | 83                     | OA      |
| 6867      | Male   | Knee  | 86                     | OA      |
| 7007      | Male   | Hip   | 77                     | OA      |
| 7008      | Female | Hip   | 75                     | OA      |
| 7015      | Female | Hip   | 64                     | OA      |

|      |        |      |    |    |
|------|--------|------|----|----|
| 7025 | Female | Hip  | 76 | OA |
| 7029 | Female | Hip  | 67 | OA |
| 7030 | Male   | Hip  | 63 | OA |
| 7034 | Female | Hip  | 60 | OA |
| 7036 | Female | Hip  | 88 | OA |
| 7037 | Female | Hip  | 80 | OA |
| 7039 | Female | Hip  | 68 | OA |
| 7040 | Male   | Hip  | 74 | OA |
| 7046 | Female | Hip  | 56 | OA |
| 7047 | Female | Hip  | 78 | OA |
| 7115 | Female | Knee | 83 | OA |
| 7116 | Male   | Knee | 51 | OA |
| 7118 | Female | Knee | 47 | OA |
| 7120 | Female | Knee | 61 | OA |
| 7124 | Male   | Knee | 64 | OA |
| 19   | Male   | Hip  | 66 | OA |
| 22   | Male   | Hip  | 48 | OA |
| 39   | Female | Knee | 72 | OA |
| 40   | Female | Hip  | 84 | OA |
| 41   | Male   | Knee | 51 | OA |
| 42   | Female | Hip  | 71 | OA |
| 45   | Male   | Knee | 83 | OA |
| 49   | Male   | Hip  | 68 | OA |
| 51   | Female | Hip  | 74 | OA |
| 52   | Female | Hip  | 74 | OA |
| 53   | Female | Hip  | 55 | OA |
| 54   | Male   | Hip  | 52 | OA |
| 57   | Male   | Knee | 63 | OA |
| 59   | Female | Knee | 60 | OA |
| 61   | Male   | Knee | 67 | OA |
| 66   | Female | Hip  | 56 | OA |
| 69   | Male   | Hip  | 57 | OA |
| 70   | Male   | Hip  | 75 | OA |
| 72   | Male   | Knee | 76 | OA |
| 73   | Female | Hip  | 46 | OA |
| 76   | Female | Knee | 65 | OA |
| 77   | Female | Knee | 71 | OA |
| 78   | Male   | Knee | 58 | OA |
| 79   | Male   | Knee | 65 | OA |
| 82   | Female | Knee | 67 | OA |
| 86   | Female | Knee | 56 | OA |
| 87   | Female | Hip  | 51 | OA |

|      |        |      |    |     |
|------|--------|------|----|-----|
| 89   | Female | Knee | 67 | OA  |
| 90   | Female | Hip  | 60 | OA  |
| 92   | Female | Hip  | 55 | OA  |
| 96   | Female | Hip  | 61 | OA  |
| 97   | Male   | Hip  | 65 | OA  |
| 98   | Male   | Hip  | 49 | OA  |
| 100  | Female | Hip  | 74 | OA  |
| 103  | Female | Knee | 70 | OA  |
| 104  | Female | Knee | 70 | OA  |
| 106  | Male   | Knee | 79 | OA  |
| 107  | Female | Knee | 41 | OA  |
| 108  | Male   | Knee | 72 | OA  |
| 109  | Female | Knee | 65 | OA  |
| 112  | Male   | Hip  | 61 | OA  |
| 114  | Female | Knee | 57 | OA  |
| 115  | Male   | Knee | 69 | OA  |
| 116  | Male   | Hip  | 89 | OA  |
| 117  | Male   | Hip  | 82 | OA  |
| 126  | Female | Hip  | 66 | OA  |
| 127  | Male   | Knee | 61 | OA  |
| 128  | Male   | Knee | 64 | OA  |
| 135  | Female | Hip  | 69 | OA  |
| 136  | Female | Knee | 68 | OA  |
| 165  | Female | Hip  | 64 | OA  |
| 166  | Female | Knee | 62 | OA  |
| T023 | Female | Hip  | 68 | NOF |
| T117 | Male   | Hip  | 85 | NOF |
| T151 | Male   | Hip  | 62 | NOF |
| T167 | Female | Hip  | 62 | NOF |
| T168 | Female | Hip  | 81 | NOF |
| T172 | Female | Hip  | 77 | NOF |
| T174 | Male   | Hip  | 86 | NOF |
| T177 | Female | Hip  | 72 | NOF |
| T178 | Female | Hip  | 62 | NOF |
| T179 | Female | Hip  | 81 | NOF |
| T184 | Female | Hip  | 62 | NOF |
| T191 | Female | Hip  | 87 | NOF |
| T192 | Female | Hip  | 71 | NOF |
| T193 | Female | Hip  | 86 | NOF |
| T195 | Female | Hip  | 80 | NOF |
| T196 | Female | Hip  | 83 | NOF |
| T204 | Female | Hip  | 76 | NOF |

|      |        |     |    |     |
|------|--------|-----|----|-----|
| T244 | Female | Hip | 97 | NOF |
| T245 | Female | Hip | 81 | NOF |
| T246 | Female | Hip | 83 | NOF |
| T005 | Male   | Hip | 69 | NOF |
| T007 | Female | Hip | 71 | NOF |
| T150 | Female | Hip | 80 | NOF |
| T152 | Female | Hip | 95 | NOF |
| T154 | Male   | Hip | 75 | NOF |
| T158 | Male   | Hip | 79 | NOF |

**Supplementary Table 2.** Details of the arthroplasty patient samples used in this study. OA, osteoarthritis; NOF, femoral neck fracture.

| Sample ID | Sex    | Limb/Joint                          | Developmental stage |
|-----------|--------|-------------------------------------|---------------------|
| 14375     | Male   | Proximal and distal tibia           | 12pcw               |
| 14395     | Female | Proximal and distal tibia           | 10pcw               |
| 14397     | Female | Proximal and distal tibia and femur | 15pcw               |
| 14423     | Male   | Proximal and distal tibia           | 12pcw               |
| 14429     | Female | Proximal and distal tibia           | 14pcw               |
| 14451     | Male   | Proximal and distal femur           | 9pcw                |
| 14453     | Female | Proximal and distal femur           | 12pcw               |
| 14460     | Female | Proximal and distal tibia           | 9pcw                |
| 14464     | Male   | Proximal and distal tibia           | 16pcw               |
| 14466     | Male   | Proximal and distal tibia           | 12pcw               |
| 14467     | Male   | Proximal and distal tibia           | 10pcw               |
| 14475     | Male   | Proximal and distal tibia           | 16pcw               |
| 14408     | Female | Proximal and distal tibia           | 14pcw               |
| 14501     | Male   | Proximal and distal tibia           | 16pcw               |
| 14513     | Female | Proximal and distal tibia and femur | 12pcw               |
| 14563     | Male   | Proximal and distal tibia           | 14pcw               |
| 14586     | Female | Proximal and distal tibia and femur | 13pcw               |
| 14604     | Female | Proximal and distal tibia           | 14pcw               |
| 14471     | Female | Proximal and distal tibia and femur | 9pcw                |
| 14555     | Male   | Proximal and distal tibia and femur | 9pcw                |
| 14453     | Female | Proximal and distal femur           | 12pcw               |
| 14562     | Female | Proximal and distal tibia           | 9pcw                |
| 14580     | Male   | Proximal and distal tibia and femur | 9pcw                |
| 14600     | Male   | Proximal and distal tibia           | 8pcw                |
| 14576     | Male   | Proximal and distal tibia and femur | 8pcw                |
| 14544     | Male   | Proximal and distal tibia           | 13pcw               |
| 14684     | Female | Proximal and distal femur           | 14pcw               |
| 14606     | Female | Proximal and distal tibia and femur | 9pcw                |
| 14617     | Female | Proximal and distal tibia and femur | 13pcw               |
| 14377     | Male   | Proximal and distal tibia           | 14pcw               |
| 14378     | Male   | Proximal and distal tibia           | 14pcw               |
| 14392     | Male   | Proximal and distal tibia           | 9pcw                |
| 14393     | Male   | Proximal and distal tibia           | 14pcw               |
| 14408     | Female | Proximal and distal tibia           | 14pcw               |
| 14472     | Male   | Proximal and distal tibia           | 12pcw               |
| 14492     | Female | Proximal and distal tibia           | 12pcw               |
| 14510     | Female | Proximal and distal tibia           | 14pcw               |
| 14511     | Female | Proximal and distal tibia           | 11pcw               |
| 14512     | Male   | Proximal and distal tibia           | 10pcw               |
| 14516     | Male   | Proximal and distal tibia           | 15pcw               |

|       |        |                                     |       |
|-------|--------|-------------------------------------|-------|
| 14521 | Male   | Proximal and distal tibia           | 12pcw |
| 14522 | Female | Proximal and distal tibia           | 15pcw |
| 14523 | Female | Proximal and distal tibia           | 15pcw |
| 14524 | Female | Proximal and distal tibia           | 15pcw |
| 14525 | Male   | Proximal and distal tibia           | 10pcw |
| 14532 | Female | Proximal and distal tibia           | 11pcw |
| 14541 | Female | Proximal and distal tibia           | 11pcw |
| 14577 | Female | Proximal and distal tibia and femur | 11pcw |
| 14597 | Male   | Proximal and distal tibia           | 11pcw |
| 14601 | Male   | Proximal and distal tibia and femur | 10pcw |
| 14603 | Female | Proximal and distal tibia and femur | 11pcw |
| 14619 | Male   | Proximal and distal tibia and femur | 16pcw |
| 14628 | Female | Proximal and distal tibia and femur | 17pcw |
| 14681 | Female | Proximal and distal tibia and femur | 11pcw |
| 14688 | Male   | Proximal and distal tibia and femur | 11pcw |
| 14689 | Male   | Proximal and distal femur           | 10pcw |
| 14703 | Female | Proximal and distal tibia and femur | 12pcw |
| 14713 | Female | Proximal and distal tibia and femur | 16pcw |
| 14715 | Male   | Proximal and distal tibia and femur | 12pcw |
| 14716 | Male   | Proximal and distal tibia and femur | 10pcw |
| 14717 | Female | Proximal and distal tibia           | 14pcw |
| 14720 | Female | Proximal and distal tibia and femur | 15pcw |
| 14721 | Female | Proximal and distal tibia and femur | 10pcw |
| 14722 | Male   | Proximal and distal tibia and femur | 17pcw |
| 14727 | Male   | Proximal and distal tibia           | 12pcw |
| 14728 | Male   | Proximal and distal tibia and femur | 16pcw |
| 14729 | Male   | Proximal and distal tibia and femur | 12pcw |
| 14738 | Male   | Proximal and distal tibia and femur | 15pcw |
| 14746 | Female | Proximal and distal tibia and femur | 16pcw |
| 14748 | Female | Proximal and distal tibia and femur | 10pcw |
| 14749 | Male   | Proximal and distal tibia and femur | 13pcw |
| 14782 | Male   | Proximal and distal tibia and femur | 10pcw |
| 14797 | Male   | Proximal and distal tibia and femur | 12pcw |
| 14831 | Female | Proximal and distal tibia and femur | 9pcw  |
| 14835 | Female | Proximal and distal tibia and femur | 12pcw |
| 14863 | Male   | Proximal and distal tibia and femur | 10pcw |
| 14881 | Female | Proximal and distal tibia and femur | 10pcw |

**Supplementary Table 3.** Details of the fetal cartilage samples used in this study. PCW, post conceptional weeks.

| Experiment         | SNP/CpG     | Position of SNP/CpG (hg19) | Oligonucleotide            |                               |                      |
|--------------------|-------------|----------------------------|----------------------------|-------------------------------|----------------------|
|                    |             |                            | Forward (5'-3')            | Reverse (5'-3')               | Sequencing (5'-3')   |
| Genotyping         | rs1046934   | chr1:184023529             | TTAGATATAGGAGATGCCACCA     | CAGGTAAACCAAGAACGCTACATA      | AGGAGATGCCACCA       |
| Genotyping and AEI | rs114661926 | chr1:184006549             | GAGAGGAGCAGTAGCGACCAGG     | AGCAAGGGGCTGCGAGGG            | TGAGGGCGGCGCGG       |
|                    | rs2274432   | chr1:184020945             | GGGAAGCGGAACCCACAG         | CCCTGAGGACGCCTGGAT            | TGTTCCGGCTTTGG       |
| Methylation        | cg15204595  | chr1:184003184             | TGTGGTTAGATTTAGAGGAAGTTGA  | AACACTTAATAAAAAATAATACCTCAATT | ATGAGAAATTAGAGGTAAGT |
|                    | cg21606956  | chr1:184211935             | TTTTGATTTATTTGTGGTTAATTTTG | CAATAACTCTACTATAATAAAATCCTCT  | TGTGGTTAATTTTGGTTT   |

**Supplementary Table 4.** Sequence of oligonucleotide primers used for genotyping, allelic expression imbalance (AEI) analysis, and methylation analysis.

| Gene            | SNP         | Genome position (hg19) | Location in gene | Alleles (MAF in EUR) | OA-risk allele | Pairwise r2 with rs1046934 in EUR |
|-----------------|-------------|------------------------|------------------|----------------------|----------------|-----------------------------------|
| <i>COLGALT2</i> | rs114661926 | chr1:184006549         | 5'UTR            | C>G (0.304)          | C              | 0.79                              |
| <i>TSEN15</i>   | rs2274432   | chr1:184020945         | Exonic           | G>A (0.327)          | G              | 1                                 |

**Supplementary Table 5.** Proxy transcript SNPs used for AEI analyses. MAF, minor allele frequency; EUR, European ancestry cohorts; UTR, untranslated region.

| Experiment                              | Oligonucleotide/gRNA name | Sequence (5'-3')              |
|-----------------------------------------|---------------------------|-------------------------------|
| Lucia - cg15204595                      | Lucia595 FWD              | ATGCATTCAGTTTGGCATCTTGAATGT   |
|                                         | Lucia595 REV              | ACTAGTGATAATAGGGCATCAACCAGAGT |
| Lucia - cg21606956                      | Lucia956 FWD              | ATGCATCAAAGTTCTGGGTAGCTCACA   |
|                                         | Lucia956 REV              | ACTAGTGAATCTCTTTGGAAGTGCTGACT |
| Demethylation/Methylation of cg15204595 | gRNA1 FWD                 | CACCGTGGAAATGTTGCATAGAGCTT    |
|                                         | gRNA1 REV                 | AAACAAGCTCTATGCAACATTCCAC     |
| Demethylation/Methylation of cg21606956 | gRNA2 FWD                 | CACCGTATTGTGGTCAGATTCAG       |
|                                         | gRNA2 REV                 | AAACTGAATCTGACCACAATAACC      |

**Supplementary Table 6.** Sequences of the oligonucleotide primers used for cloning the regions containing cg15204595 and cg21606959 into the Lucia CpG-free-promoter vector, and of the gRNAs used for the targeted demethylation/methylation of cg15204595 and cg21606959. Sequences in red for the Lucia oligonucleotides are restriction enzyme sites used for cloning - ATGCAT, NsiI; ACTAGT, SpeI. Sequences in red for the gRNA oligonucleotides are to facilitate cloning.

| Gene            | Assay             |
|-----------------|-------------------|
| <i>COLGALT2</i> | Hs.PT.58.19198739 |
| <i>TSEN15</i>   | Hs.PT.58.24776232 |

**Supplementary Table 7.** The pre-designed IDT RT-qPCR assays used to quantify gene expression.



| CpG             | Nominal P value | Slope        | CpG.chr | CpG.pos   | CpG.strand | CpG.Island | CpG.Group               | CpG.GeneSymbol       |
|-----------------|-----------------|--------------|---------|-----------|------------|------------|-------------------------|----------------------|
| cg21606956      | 0.00238879      | 0.158917453  | chr1    | 184211934 | -          | OpenSea    |                         |                      |
| cg15204595      | 0.005077495     | 0.255571328  | chr1    | 184003184 | +          | N_Shelf    | Body                    | COLGALT2             |
| cg01436608      | 0.04128075      | 0.178202059  | chr1    | 184005534 | -          | Island     | Body                    | COLGALT2             |
| cg22340762      | 0.051489372     | -0.177768504 | chr1    | 183823538 | +          | OpenSea    | Body                    | RGL1                 |
| cg17002156      | 0.054070936     | 0.232924321  | chr1    | 183995878 | +          | OpenSea    | Body                    | COLGALT2             |
| cg21404028      | 0.10836635      | 0.092775989  | chr1    | 184020687 | -          | N_Shore    | TSS200;TSS200;TSS200    | TSEN15;TSEN15;TSEN15 |
| cg12222949      | 0.1130119       | 0.16041609   | chr1    | 184005360 | +          | Island     | Body                    | COLGALT2             |
| cg15111486      | 0.133341488     | -0.104192865 | chr1    | 184195211 | -          | OpenSea    |                         |                      |
| cg05777716      | 0.144389699     | -0.080063479 | chr1    | 184006285 | -          | Island     | 1stExon                 | COLGALT2             |
| cg13951632      | 0.184928856     | 0.120100661  | chr1    | 183897368 | -          | OpenSea    | 3'UTR                   | RGL1                 |
| cg15569801      | 0.187897516     | 0.066928549  | chr1    | 184197096 | -          | OpenSea    |                         |                      |
| cg27177158      | 0.194193974     | 0.100123681  | chr1    | 184121585 | -          | OpenSea    |                         |                      |
| cg02314308      | 0.194957334     | 0.110305009  | chr1    | 184006972 | -          | S_Shore    | TSS200                  | COLGALT2             |
| cg27444414      | 0.230101787     | 0.092115213  | chr1    | 184122874 | -          | OpenSea    |                         |                      |
| cg10312498      | 0.240591977     | -0.109116001 | chr1    | 183957982 | -          | OpenSea    | Body                    | COLGALT2             |
| cg16655084      | 0.243080607     | 0.081155105  | chr1    | 184005896 | +          | Island     | Body                    | COLGALT2             |
| cg12136256      | 0.248654028     | -0.136178579 | chr1    | 183952796 | +          | OpenSea    | Body                    | COLGALT2             |
| cg14773259      | 0.292969986     | 0.085088592  | chr1    | 184021034 | -          | Island     | Body;Body;Body          | TSEN15;TSEN15;TSEN15 |
| cg22400420      | 0.304191771     | -0.088312676 | chr1    | 183851242 | -          | OpenSea    | Body                    | RGL1                 |
| cg18131582      | 0.363285827     | 0.104087735  | chr1    | 183912305 | -          | OpenSea    | Body                    | COLGALT2             |
| cg00464025      | 0.381248495     | -0.040631933 | chr1    | 183907542 | -          | OpenSea    | 3'UTR                   | COLGALT2             |
| cg19101018      | 0.385337956     | -0.063402477 | chr1    | 183925532 | -          | OpenSea    | Body                    | COLGALT2             |
| cg21417627      | 0.447531032     | -0.067376864 | chr1    | 184008235 | -          | S_Shore    | TSS1500                 | COLGALT2             |
| cg14313310      | 0.485865459     | 0.055906007  | chr1    | 184006816 | -          | S_Shore    | 5'UTR;1stExon           | COLGALT2;COLGALT2    |
| cg09940311      | 0.496887744     | -0.110077477 | chr1    | 183901666 | -          | OpenSea    |                         |                      |
| cg06849459      | 0.514610056     | -0.04667026  | chr1    | 183891439 | -          | OpenSea    | Body                    | RGL1                 |
| cg01068808      | 0.530912366     | -0.075189524 | chr1    | 184007101 | -          | S_Shore    | TSS1500                 | COLGALT2             |
| cg18073970      | 0.542309516     | -0.057603771 | chr1    | 184006765 | +          | Island     | 5'UTR;1stExon           | COLGALT2;COLGALT2    |
| cg09684066      | 0.558049453     | 0.031355578  | chr1    | 183891565 | +          | OpenSea    | Body                    | RGL1                 |
| cg25605307      | 0.560179747     | -0.0498599   | chr1    | 183965312 | -          | OpenSea    | Body                    | COLGALT2             |
| cg11678039      | 0.580064206     | 0.041394928  | chr1    | 183841259 | -          | OpenSea    | Body                    | RGL1                 |
| cg16716196      | 0.595667485     | 0.049572938  | chr1    | 184195068 | -          | OpenSea    |                         |                      |
| cg03467001      | 0.604461199     | -0.063457988 | chr1    | 183857649 | -          | OpenSea    | Body                    | RGL1                 |
| cg03943177      | 0.611155155     | 0.052335755  | chr1    | 184021360 | +          | S_Shore    | Body;Body;Body          | TSEN15;TSEN15;TSEN15 |
| cg06915270      | 0.642327728     | 0.027943555  | chr1    | 183891360 | +          | OpenSea    | Body                    | RGL1                 |
| cg17357479      | 0.658357979     | -0.037040788 | chr1    | 184005717 | -          | Island     | Body                    | COLGALT2             |
| cg10807943      | 0.689234253     | -0.020570128 | chr1    | 184021131 | +          | S_Shore    | Body;Body;Body          | TSEN15;TSEN15;TSEN15 |
| cg12702671      | 0.711635427     | 0.031402346  | chr1    | 183885210 | -          | OpenSea    | Body                    | RGL1                 |
| cg20942099      | 0.7233262       | -0.023790576 | chr1    | 184007803 | +          | S_Shore    | TSS1500                 | COLGALT2             |
| cg09013655      | 0.754989126     | -0.032897006 | chr1    | 184005063 | -          | N_Shore    | Body                    | COLGALT2             |
| cg12792264      | 0.765268544     | -0.035320275 | chr1    | 183971636 | +          | OpenSea    | Body                    | COLGALT2             |
| cg00044463      | 0.766522434     | 0.02378764   | chr1    | 184006933 | +          | S_Shore    | TSS200                  | COLGALT2             |
| cg24721630      | 0.769637772     | 0.027460413  | chr1    | 184006216 | +          | Island     | Body                    | COLGALT2             |
| cg02890642      | 0.78153886      | -0.021560653 | chr1    | 184017798 | -          | N_Shelf    |                         |                      |
| cg27291258      | 0.784525638     | -0.043489618 | chr1    | 184173289 | +          | OpenSea    |                         |                      |
| cg12758231      | 0.787779993     | 0.019910919  | chr1    | 184020711 | +          | N_Shore    | TSS200;TSS200;TSS200    | TSEN15;TSEN15;TSEN15 |
| cg15359501      | 0.792639164     | 0.015547072  | chr1    | 184006496 | -          | Island     | 5'UTR;1stExon           | COLGALT2;COLGALT2    |
| cg26429856      | 0.798737947     | 0.013574529  | chr1    | 184005990 | +          | Island     | Body                    | COLGALT2             |
| cg18189236      | 0.821703244     | -0.025694924 | chr1    | 184009497 | -          | S_Shelf    |                         |                      |
| cg05816006      | 0.839369641     | -0.018867477 | chr1    | 184042579 | +          | OpenSea    | 3'UTR;3'UTR;Body        | TSEN15;TSEN15;TSEN15 |
| cg11387897      | 0.849670158     | 0.012868174  | chr1    | 183914188 | -          | OpenSea    | Body                    | COLGALT2             |
| cg12631766      | 0.887366794     | -0.015505912 | chr1    | 184025029 | -          | S_Shelf    | Body;Body;Body          | TSEN15;TSEN15;TSEN15 |
| cg11346030      | 0.915841776     | 0.009511507  | chr1    | 184090950 | -          | OpenSea    |                         |                      |
| cg06379531      | 0.921982985     | -0.00580673  | chr1    | 184020410 | -          | N_Shore    | TSS1500;TSS1500;TSS1500 | TSEN15;TSEN15;TSEN15 |
| cg23040305      | 0.96965166      | 0.004039352  | chr1    | 183846243 | -          | OpenSea    | Body                    | RGL1                 |
| cg15521745      | 0.983100265     | 0.001355847  | chr1    | 184133404 | -          | OpenSea    |                         |                      |
| ch.1.182359526R | 0.987854652     | 0.001960897  | chr1    | 184092903 | +          | OpenSea    |                         |                      |
| cg20271396      | 0.99541804      | -0.000473252 | chr1    | 184020713 | +          | N_Shore    | TSS200;TSS200;TSS200    | TSEN15;TSEN15;TSEN15 |

**Supplementary Table 8.** rs1046934 mQTL analysis of CpGs located 200kb upstream and downstream of the SNP. CpGs are ranked by *P* value. CpGs with *P* < 0.05 are highlighted.

| SNP         | Chromosome | Start (hg19) | End (hg19) | Alleles  | MAF    | Distance | D'     | r2     | TF Binding? | TF1 TPM      | TF2 TPM       | ROADMAP                        |
|-------------|------------|--------------|------------|----------|--------|----------|--------|--------|-------------|--------------|---------------|--------------------------------|
| rs74767794  | chr1       | 184006128    | 184006129  | (A/G)    | 0.3002 | 17401    | 0.9557 | 0.8063 | Yes         | SP2 (13.9)   |               | Promoter (COLGALT2)            |
| rs3814333   | chr1       | 184007119    | 184007120  | (C/T)    | 0.3002 | 16410    | 0.9557 | 0.8063 | No          |              |               | Promoter (COLGALT2)            |
| rs1926874   | chr1       | 184009788    | 184009789  | (C/T)    | 0.325  | 13741    | 0.9773 | 0.9465 | No          |              |               | Quiescent (Intergenic)         |
| rs5779197   | chr1       | 184009826    | 184009827  | (-/AA)   | 0.3241 | 13703    | 0.9772 | 0.9421 | Yes         | STAT1 (26.3) | STAT2 (71.7)  | Quiescent (Intergenic)         |
| rs10494574  | chr1       | 184010727    | 184010728  | (C/A)    | 0.332  | 12802    | 0.9681 | 0.9165 | No          |              |               | Quiescent (Intergenic)         |
| rs4650650   | chr1       | 184012841    | 184012842  | (A/G)    | 0.325  | 10688    | 0.9773 | 0.9465 | Yes         | SP2 (13.9)   | ZNF263 (17.2) | Quiescent (Intergenic)         |
| rs12029527  | chr1       | 184013318    | 184013319  | (C/A)    | 0.325  | 10211    | 0.9773 | 0.9465 | No          |              |               | Quiescent (Intergenic)         |
| rs12047271  | chr1       | 184013491    | 184013492  | (T/C)    | 0.325  | 10038    | 0.9773 | 0.9465 | No          |              |               | Quiescent (Intergenic)         |
| rs12022430  | chr1       | 184013495    | 184013496  | (A/G)    | 0.325  | 10034    | 0.9773 | 0.9465 | Yes         | FEV (0.1)    |               | Quiescent (Intergenic)         |
| rs12044334  | chr1       | 184013831    | 184013832  | (G/C)    | 0.326  | 9698     | 0.9728 | 0.9421 | No          |              |               | Quiescent (Intergenic)         |
| rs1327124   | chr1       | 184014199    | 184014200  | (A/G)    | 0.329  | 9330     | 0.9683 | 0.9292 | No          |              |               | Quiescent (Intergenic)         |
| rs1327123   | chr1       | 184014593    | 184014594  | (G/C)    | 0.327  | 8936     | 0.991  | 0.982  | Yes         | Pax4 (0.4)   | ZNF354C (1.7) | Quiescent (Intergenic)         |
| rs10797937  | chr1       | 184017131    | 184017132  | (A/G)    | 0.326  | 6398     | 0.9955 | 0.9865 | No          |              |               | Quiescent (Intergenic)         |
| rs1926872   | chr1       | 184018475    | 184018476  | (T/C)    | 0.326  | 5054     | 0.9955 | 0.9865 | Yes         | Crx (6.2)    |               | Quiescent (Intergenic)         |
| rs71694372  | chr1       | 184018973    | 184018974  | (TCTT/-) | 0.326  | 4556     | 0.9955 | 0.9865 | No          |              |               | Quiescent (Intergenic)         |
| rs10797938  | chr1       | 184019954    | 184019955  | (C/A)    | 0.326  | 3575     | 0.9955 | 0.9865 | No          |              |               | Enhancer                       |
| rs2274432   | chr1       | 184020945    | 184020946  | (G/A)    | 0.327  | 2584     | 1      | 1      | No          |              |               | Promoter (Exon 1, TSEN15)      |
| rs1046934   | chr1       | 184023529    | 184023530  | (A/C)    | 0.303  | n/a      | 1      | 1      | No          |              |               | Transcribed (Exon 2, TSEN15)   |
| rs112621660 | chr1       | 184029915    | 184029916  | (AGTT/-) | 0.327  | 6386     | 1      | 1      | No          |              |               | Transcribed (Intronic, TSEN15) |
| rs1952256   | chr1       | 184035116    | 184035117  | (A/G)    | 0.327  | 11587    | 1      | 1      | No          |              |               | Transcribed (Intronic, TSEN15) |
| rs3032594   | chr1       | 184035420    | 184035421  | (TATT/-) | 0.327  | 11891    | 1      | 1      | No          |              |               | Transcribed (Intronic, TSEN15) |

**Supplementary Table 9.** SNPs in the LD block marked by rs1046934. MAF, minor allele frequency in European ancestry cohorts (EUR); Distance, base pair distance from rs1046934; TF binding, SNP predicted to impact transcription factor binding based on position weight score (PWS) in the SNP2TFBS database; TF1, TF2, transcription factors with predicted altered binding introduced by the SNP, and their mean expression value in arthroplasty hip cartilage expressed as transcripts per million (TPM); ROADMAP, chromatin state data from ROADMAP 15 state model in MSC-derived chondrocytes (E049).

## Supplementary text

Accounting for the observation that the *COLGALT2* meQTLs have opposing slopes.

To be read in conjunction with Supplementary Figure 4.

The OA risk-conferring allele A of rs1046934 is associated with lower methylation levels at cg15204595 and cg21606956 compared to the non-risk allele C in both arthroplasty (Figure 4A) and fetal (Figure 5B) samples. Allele A is also associated with higher *COLGALT2* expression, as evidenced by the AEI analyses, in both tissue types (Figure 2A and Figure 5A). Methylation-expression (meQTL) plots show associations between methylation levels at both CpGs and *COLGALT2* AEI ratios (Figure 4B and Figure 5C). However, while higher methylation levels at cg15204595 are associated with lower allelic ratios, the opposite is observed at cg21606956, with higher methylation levels corresponding to higher allelic ratios. This is true for both arthroplasty (Figure 4B) and fetal (Figure 5C) samples.

This can be explained if the methylation levels at the two CpGs are influenced by factors other than rs1046934 genotype.

In a theoretical model where a regulatory SNP affects methylation levels at two CpG sites (CpG1 and CpG2), with its major allele (M) associated with low methylation and its minor allele (m) with high methylation at both CpG1 and CpG2, individuals homozygous for the major allele (MM) will have low methylation levels, individuals homozygous for the minor allele (mm) will have high methylation levels, and heterozygous individuals will have intermediate methylation levels at both CpGs (Supplementary Figure 4A and 4B). Assume two additional factors affect the methylation levels at CpG1 and CpG2 in this theoretical model: Effect 1, which has a constant effect on the methylation at CpG1 leading to high levels of methylation at the CpG, and Effect 2, which has a constant effect on the methylation at CpG2 leading to low levels of methylation at the CpG (Supplementary Figure 4A and 4B). If these two hypothetical effects are weaker than the effect the SNP has on the methylation at CpG1 and CpG2, they will be masked in individuals homozygous at the SNP (MM or mm). However, in heterozygous individuals (Mm), they will not be masked: Effect 1 will complement the effect of the minor allele (m) of the SNP and the overall methylation levels at CpG1 will be higher than the expected mean but lower than (mm) homozygotes (Supplementary Figure 4B, left); Effect 2 will complement the effect of the major allele (M) of the SNP and the overall methylation levels at CpG2 will be lower than the expected mean but higher than (MM) homozygotes (Supplementary Figure 4B, right).

If both the effects of the SNP and Effect 1 or Effect 2 (for CpG1 and CpG2, respectively) are taken into consideration, the expected mQTL plots for CpG1 and CpG2 will show a similar trend (Supplementary Figure 4C). If the methylation levels at CpG1 are plotted against the levels at CpG2 for all individuals irrespective of SNP genotype, low levels of methylation at one CpG will correspond to low levels at the other (Supplementary Figure 4D, left). When the same plot is created for heterozygous individuals, however, the trend is reversed and low methylation levels at one CpG will correspond to higher levels at the other (Supplementary Figure 4D, right). This observation is expected since the weaker effects of Effect 1 and Effect 2 complement the effects of the minor and the major alleles (respectively) of the SNP, with the SNP alleles have opposing effects on methylation levels.

The theoretical scenarios described here are consistent with our actual observations in arthroplasty and fetal samples. When methylation levels at cg15204595 and cg21606956

are plotted against genotype at rs1046934 they show a similar trend in both arthroplasty (Figure 4A) and fetal (Figure 5B) samples. When methylation levels at cg15204595 are plotted against the levels at cg21606956 for all arthroplasty (Supplementary Figure 4E, top left) and all fetal (Supplementary Figure 4E, bottom left) samples, low methylation levels at one CpG associate with low methylation levels at the other. This is particularly striking when only rs1046934 homozygotes (AA and CC) are plotted (Supplementary Figure 4E, top middle [arthroplasty] and bottom middle [fetal]). However, in heterozygous (AC) samples (Supplementary Figure 4E, top right [arthroplasty] and bottom right [fetal]), low methylation at one CpG associates with higher methylation at the other.

The *COLGALT2* meQTL plots in Figure 4B and Figure 5C show methylation levels at cg15204595 and cg21606956 plotted against AEI ratios in arthroplasty and fetal samples. The AEI analysis is carried out in heterozygous individuals in which lower methylation levels at cg15204595 correspond to higher methylation levels at cg21606956. This leads to the meQTL plots having opposing slopes.
